# Supplementary material for: Chemoenzymatic Stereodivergent Synthesis of All the Possible Stereoisomers of the 2,3-Dimethylglyceric Acid Ethyl Ester
Source: MDPI journal article supplement (doi:10.3390/catal11121440), 2021-11-26
Supplement: s1 [file s1]

Supplementary Material

# Chemoenzymatic Stereodivergent Synthesis of all the Possible Stereoisomers of the 2,3-Dimethylglyceric Acid Ethyl Ester

Francesco Presini <sup>1</sup>, Graziano Di Carmine <sup>1</sup>, Pier Paolo Giovannini <sup>1,\*</sup>, Virginia Cristofori <sup>1</sup>,  
Lindomar Alberto Lerin <sup>1</sup>, Olga Bortolini <sup>2</sup>, Claudio Trapella <sup>1</sup> and Anna Fantinati <sup>2</sup>

<sup>1</sup> Department of Chemistry, Pharmaceutical and Agricultural Sciences, University of Ferrara, Via Luigi Borsari, 46, 44121 Ferrara, Italy; francesco.presini@edu.unife.it (F.P.); graziano.dicarmine@unife.it (G.D.C.); virginia.cristofori@unife.it (V.C.); lrnlmd@unife.it (L.A.L.); trpcld@unife.it (C.T.)

<sup>2</sup> Department of Environmental and Prevention Sciences, University of Ferrara, Via Luigi Borsari, 46, 44121 Ferrara, Italy; olga.bortolini@unife.it (O.B.); anna.fantinati@unife.it (A.F.)

\* Correspondence: pierpaolo.giovannini@unife.it; Tel.: +39-0532-974532

**Abstract:** 2,3-dihydroxy-2-methylbutyric acid, also known as 2,3-dimethylglyceric acid, constitutes the acyl and/or the alcoholic moiety of many bioactive natural esters. Herein, we describe a chemoenzymatic methodology which gives access to all the four possible stereoisomers of the 2,3-dimethylglyceric acid ethyl ester. The racemic ethyl  $\alpha$ -acetolactate, produced by the *N*-heterocycle carbene (NHC)-catalyzed coupling of ethyl pyruvate and methylacetoin was employed as the starting material. The racemic mixture was resolved through (*S*)-selective reductions, promoted by the acetylacetoin reductase (AAR) affording the resulting ethyl (2*R*,3*S*)-2,3-dimethylglycerate; the isolated remaining (*S*)-ethyl  $\alpha$ -acetolactate was successively treated with baker's yeast to obtain the corresponding (2*S*,3*S*) stereoisomer. *syn*-2,3-Dimethylglyceric acid ethyl ester afforded by reducing the *rac*- $\alpha$ -acetolactate with NaBH<sub>4</sub> in the presence of ZnCl<sub>2</sub> was kinetically resolved through selective acetylation with lipase B from *Candida antarctica* (CAL-B) and vinyl acetate to access to (2*S*,3*R*) stereoisomer. Finally, the (2*R*,3*R*) stereoisomer, was prepared by C3 epimerization of the (2*R*,3*S*) stereoisomer recovered from the above kinetic resolution, achieved through the TEMPO-mediated oxidation, followed by the reduction of the produced ketone with NaBH<sub>4</sub>. The resulting 2,3-dimethylglycerate enriched in the (2*R*,3*R*) stereoisomer was submitted to stereospecific acetylation with vinyl acetate and CAL-B in order to separate the major stereoisomer. The entire procedure enabled conversion of the racemic  $\alpha$ -acetolactate into the four enantiopure stereoisomers of the ethyl 2,3-dihydroxy-2-methylbutyrate with the following overall yields: 42% for the (2*R*,3*S*), 40% for the (2*S*,3*S*), 42% for the (2*S*,3*R*) and 20% for the (2*R*,3*R*).

**Keywords:** biocatalysis; stereodivergent synthesis; asymmetric synthesis; natural compounds.

**Citation:** Presini, F.; Di Carmine, G.; Giovannini, P.P.; Cristofori, V.; Lerin, L.A.; Bortolini, O.; Trapella, C.; Fantinati, A. Chemoenzymatic Stereodivergent Synthesis of all the Possible Stereoisomers of the 2,3-Dimethylglyceric Acid Ethyl Ester. *Catalysts* **2021**, *11*, 1440. <https://doi.org/10.3390/catal11121440>

Academic Editors: Yan Zhang, Raushan Kumar Singh and Evangelos Topakas

Received: 15 October 2021

Accepted: 24 November 2021

Published: 26 November 2021

**Publisher's Note:** MDPI stays neutral with regard to jurisdictional claims in published maps and institutional affiliations.

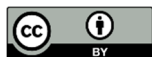

**Copyright:** © 2021 by the authors. Licensee MDPI, Basel, Switzerland. This article is an open access article distributed under the terms and conditions of the Creative Commons Attribution (CC BY) license (<http://creativecommons.org/licenses/by/4.0/>).

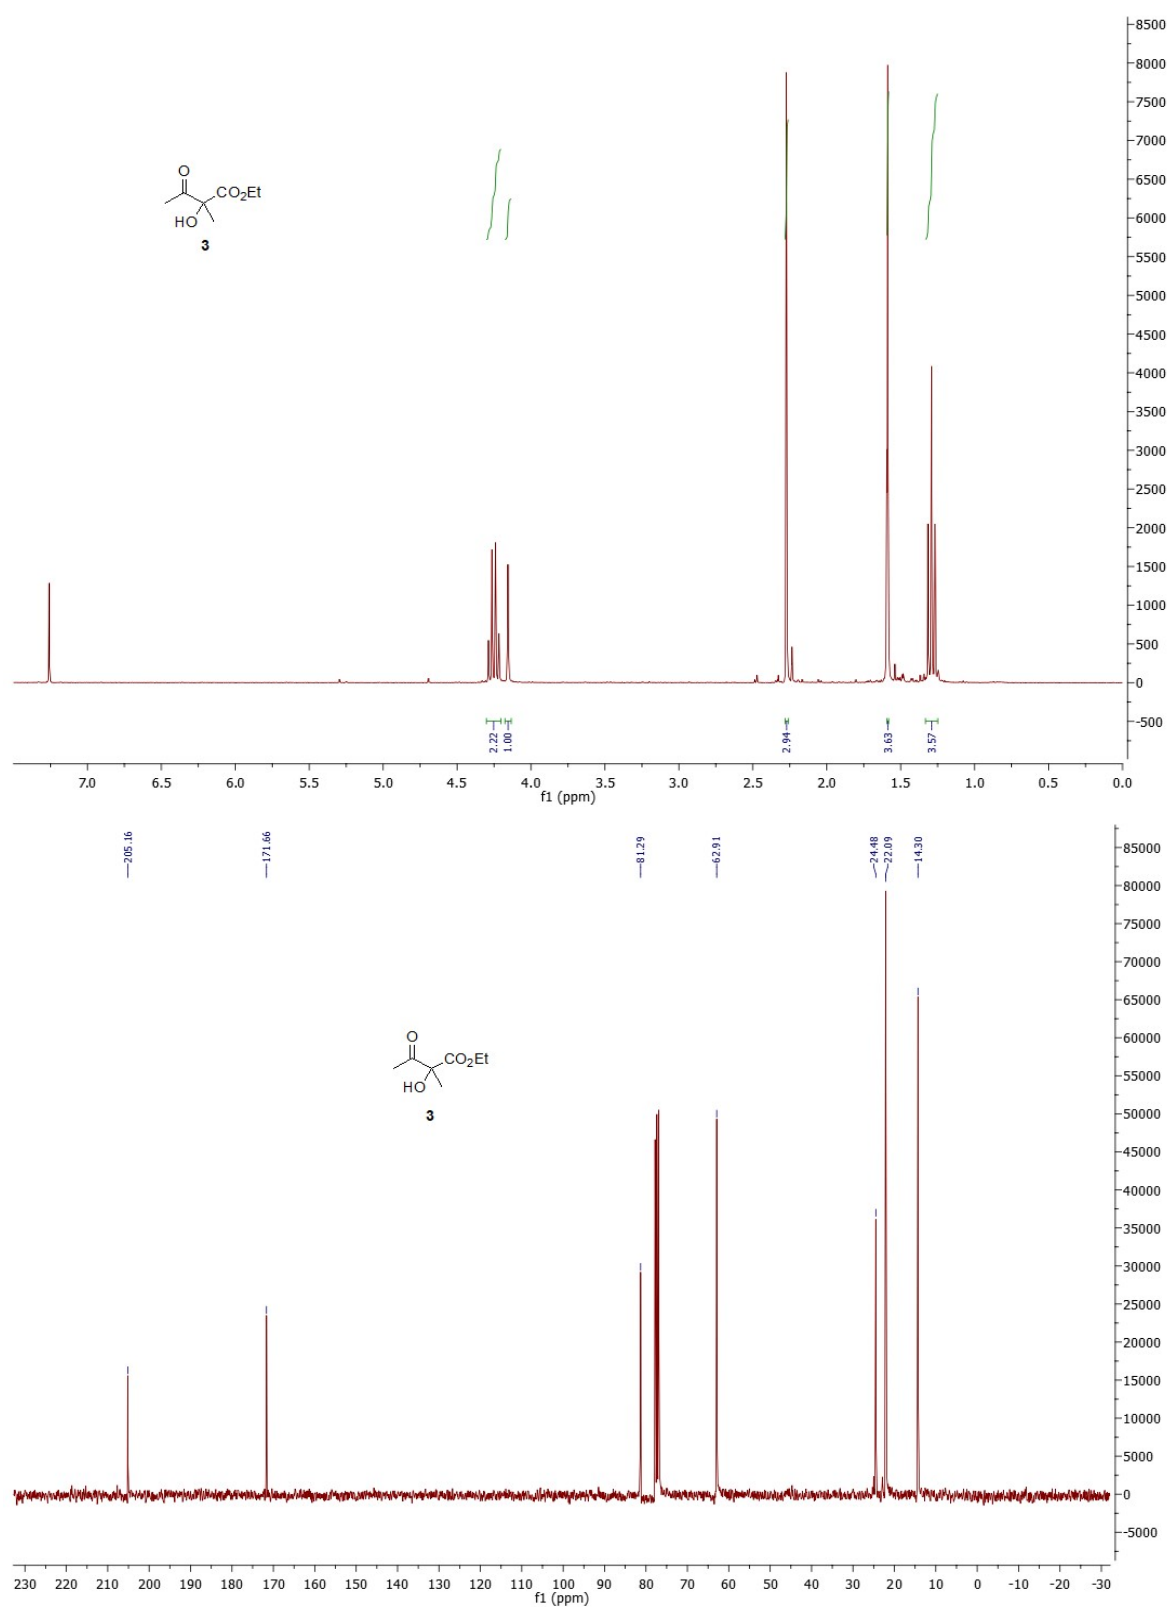

Figure S1. <sup>1</sup>H- and <sup>13</sup>C-NMR spectra of compound 3.

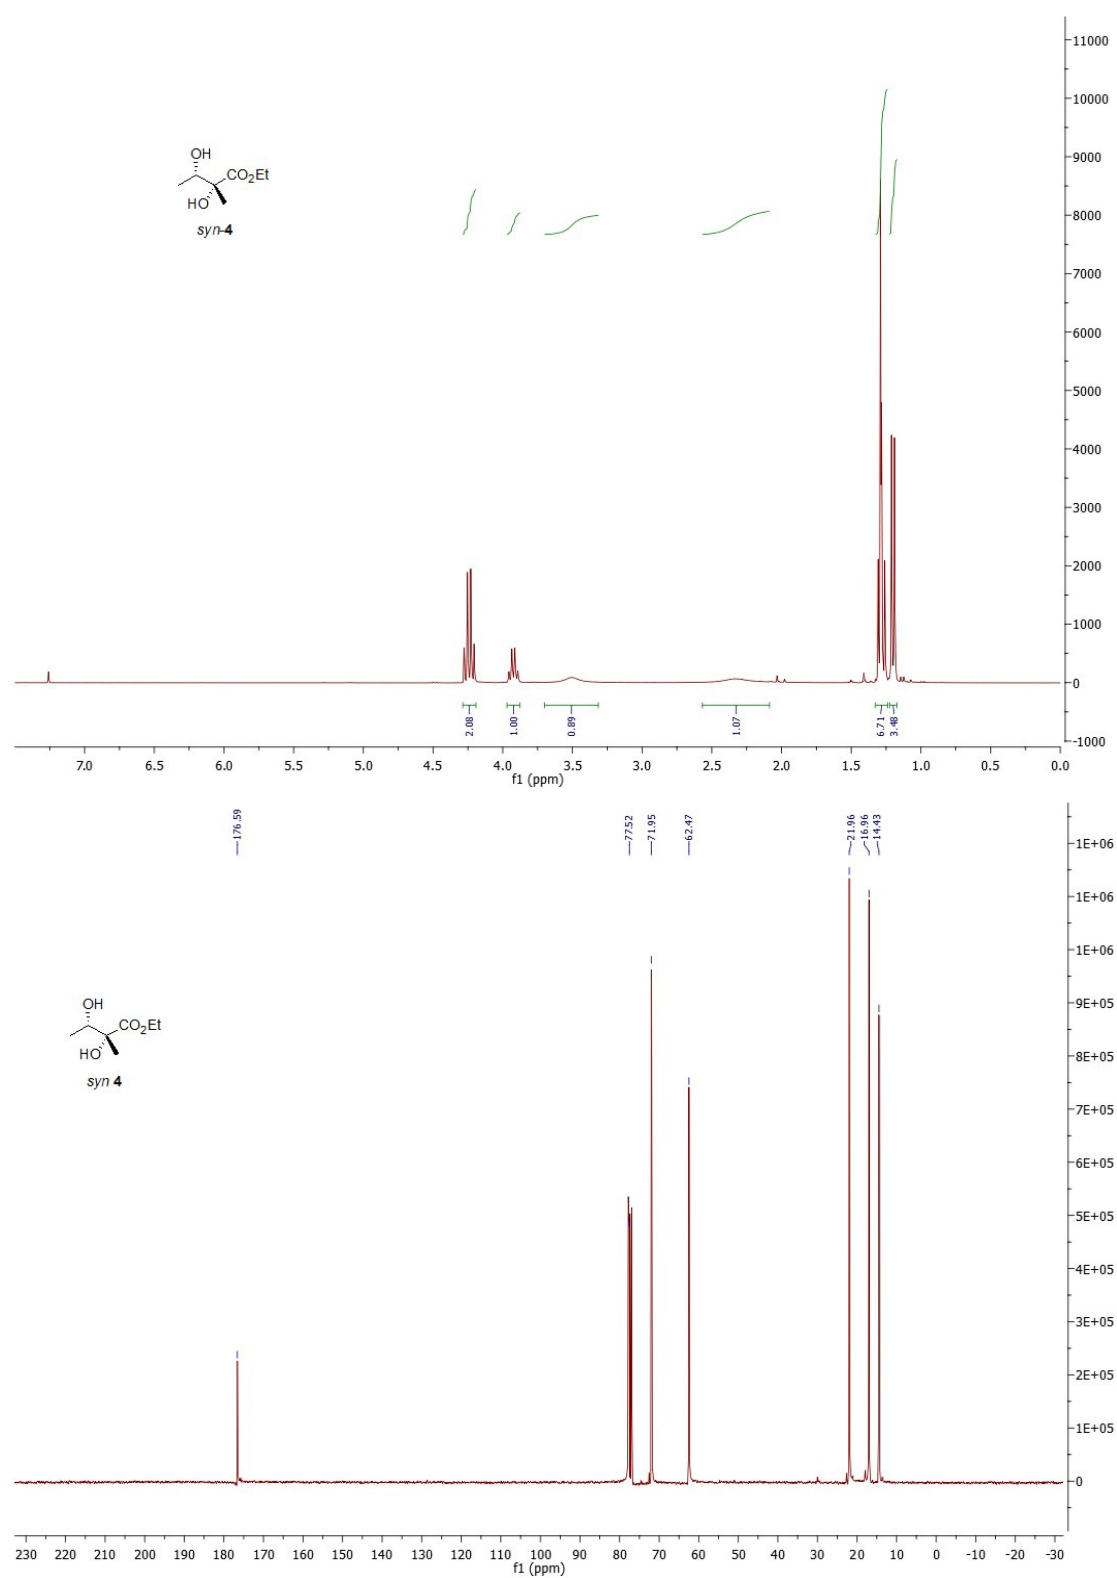

Figure S2. <sup>1</sup>H- and <sup>13</sup>C-NMR spectra of *syn*-4 [(2*R*,3*S*)-4 and (2*S*,3*R*)-4].

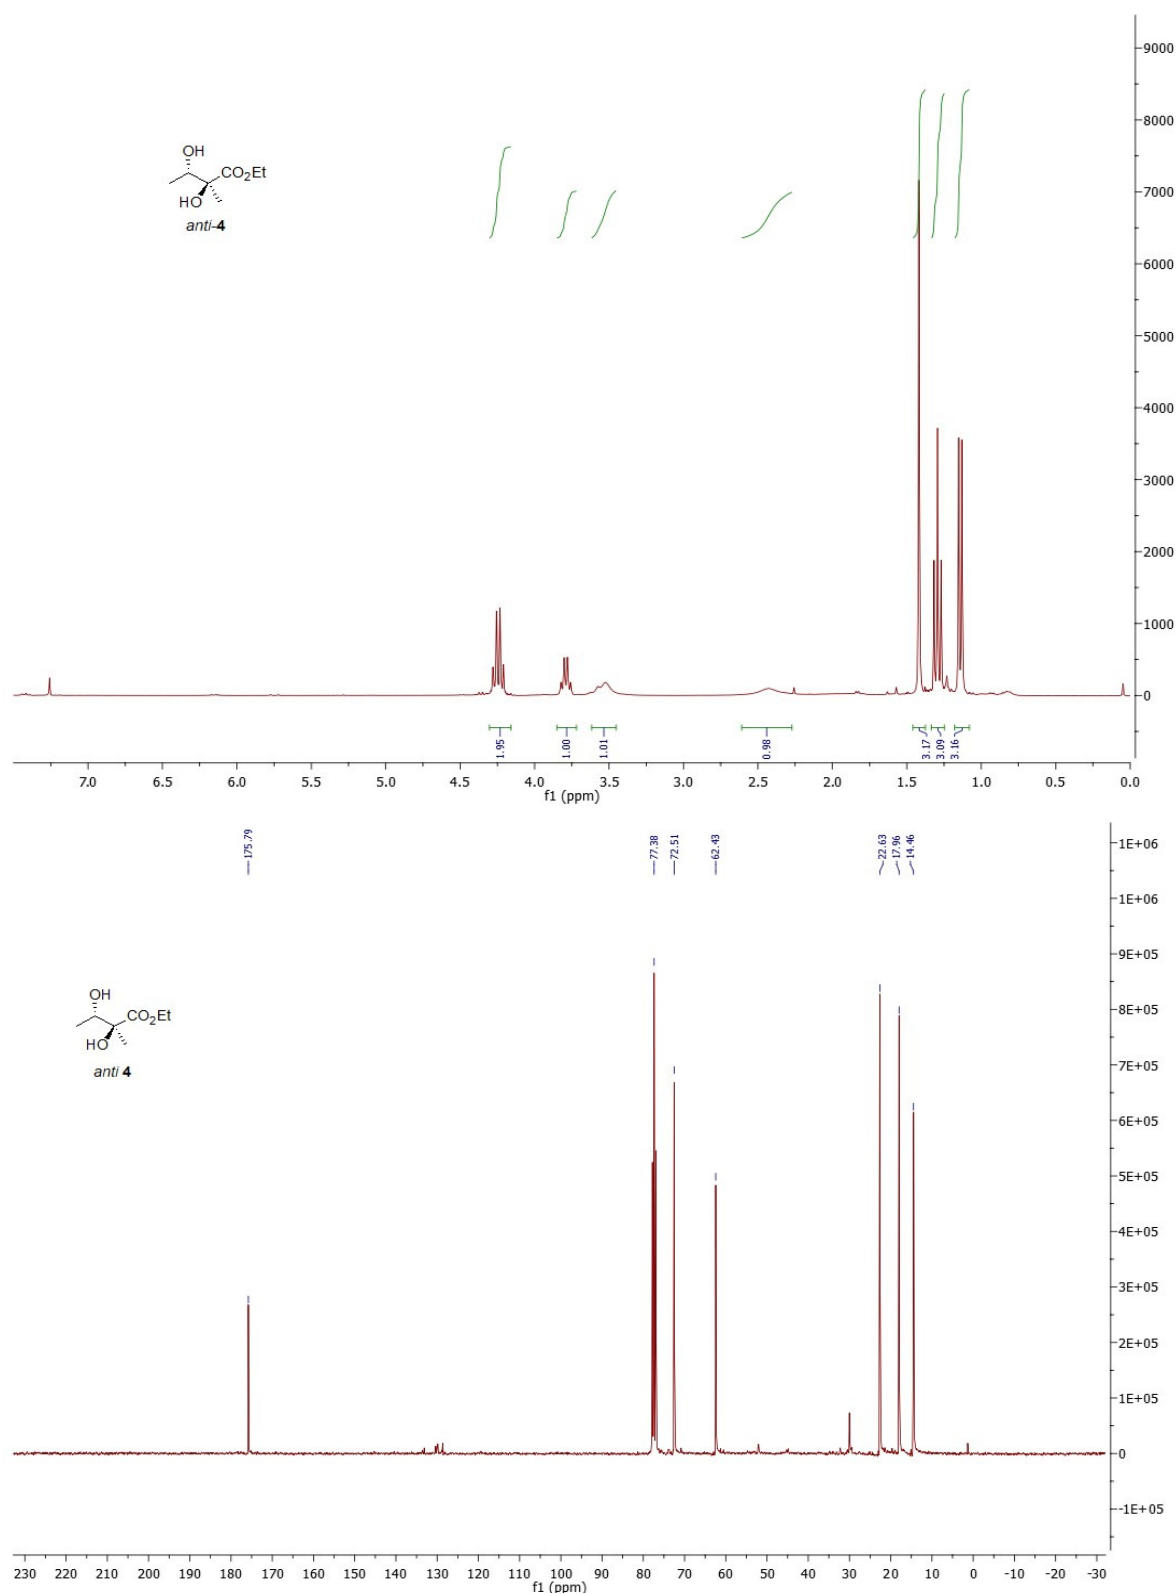

Figure S3. <sup>1</sup>H- and <sup>13</sup>C-NMR spectra of *anti*-4 [(2*S*,3*S*)-4 and (2*R*,3*R*)-4].

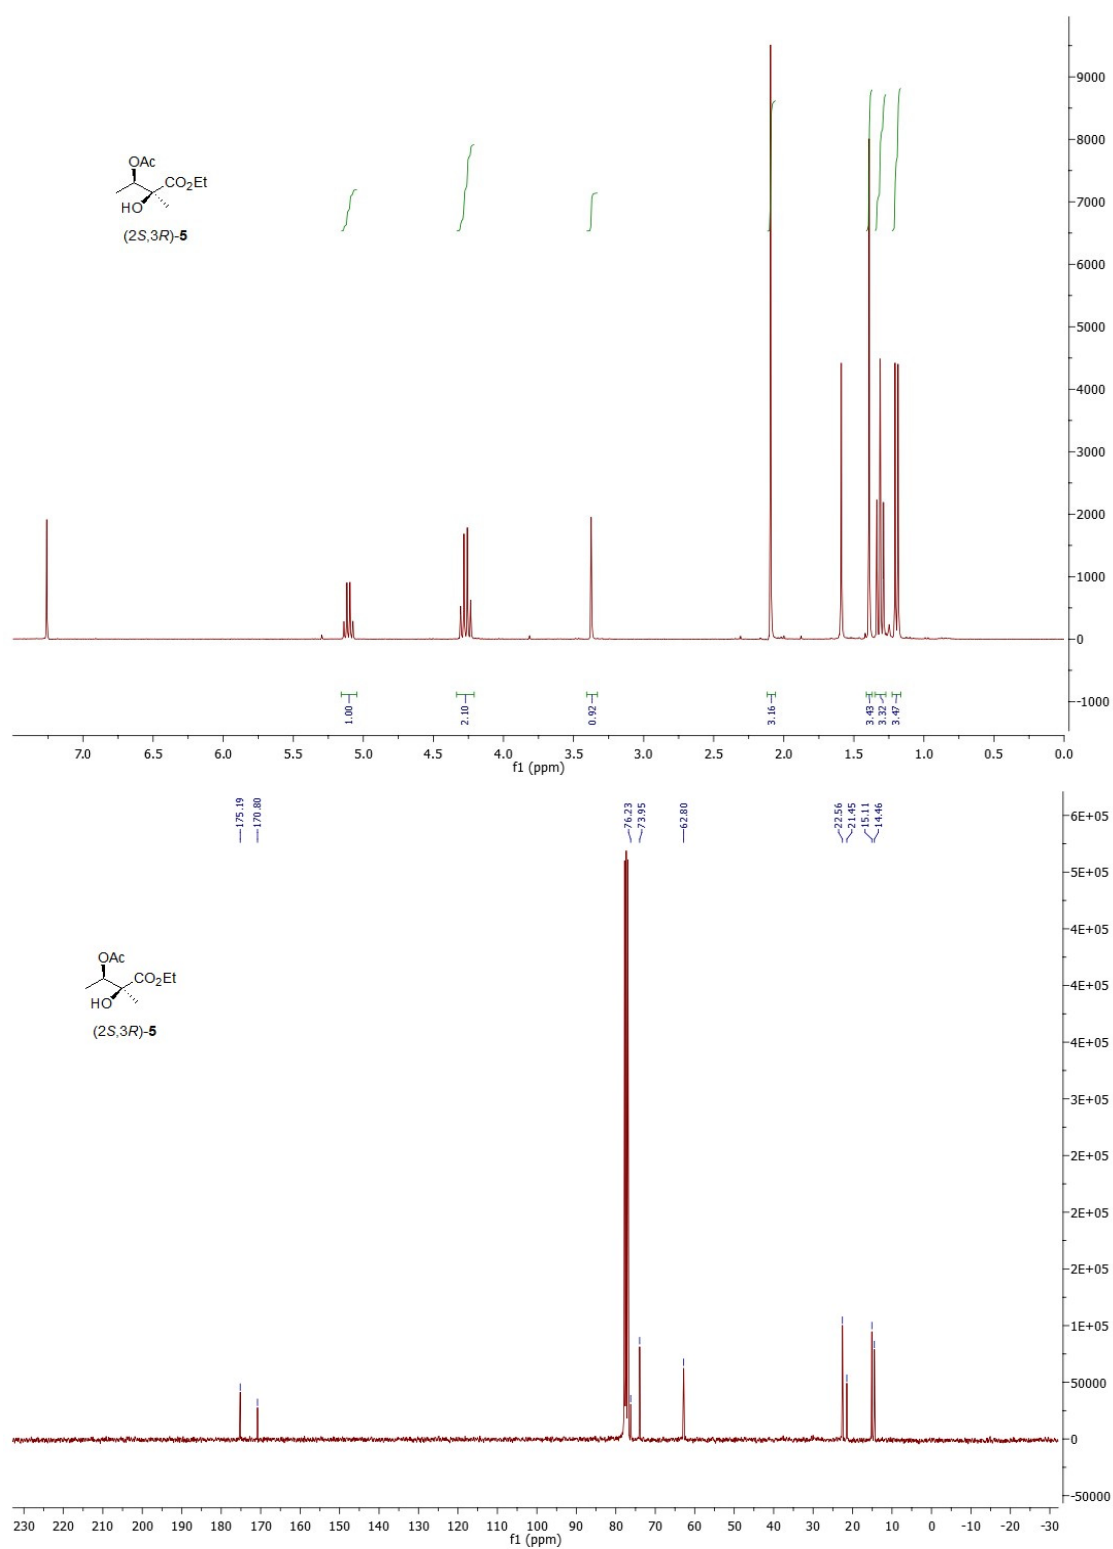

Figure S4.  $^1\text{H}$ - and  $^{13}\text{C}$ -NMR spectra of (2S,3R)-5.

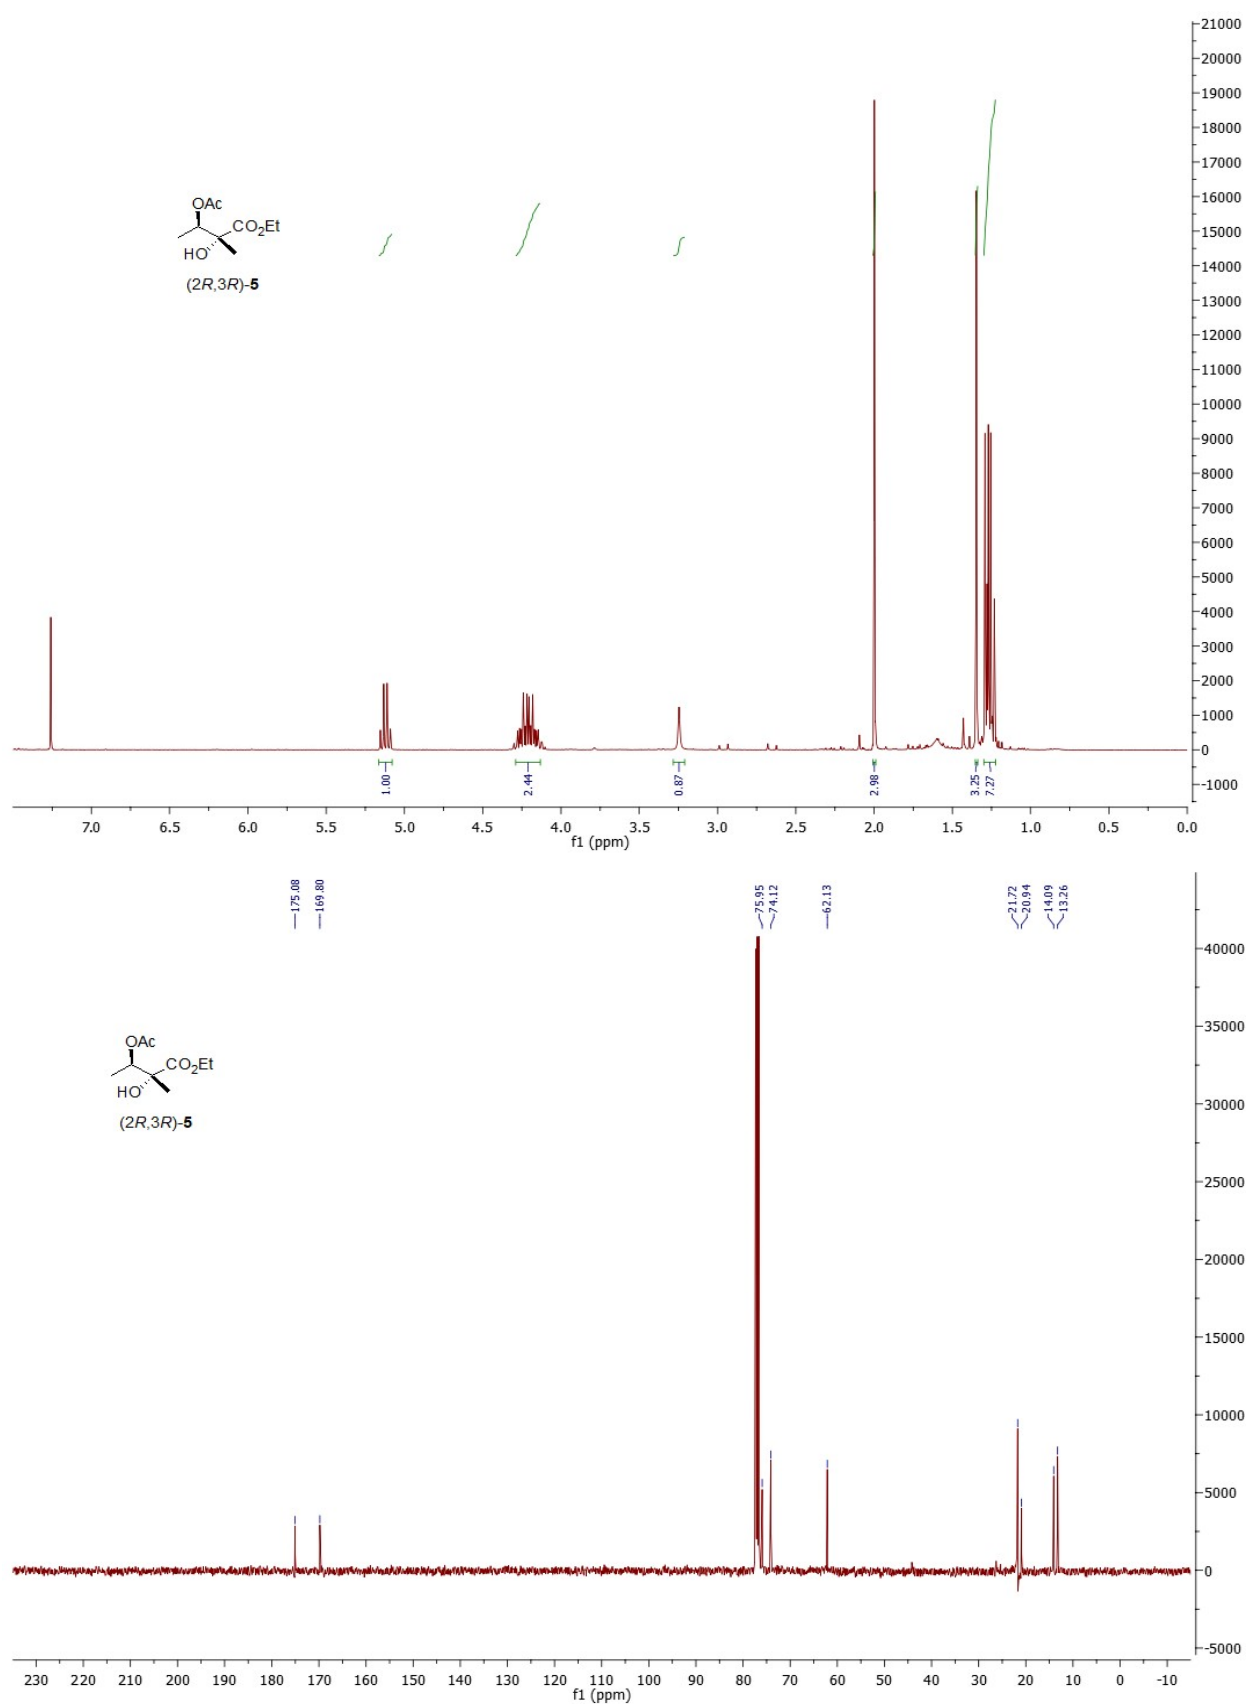Figure S5.  $^1\text{H}$ - and  $^{13}\text{C}$ -NMR spectra of  $(2R,3R)$ -5.

$^1\text{H}$ -NMR spectrum of the *syn*/*anti* mixture of **4** obtained by reduction of racemic **3** with  $\text{NaBH}_4$  in the absence of  $\text{ZnCl}_2$ .

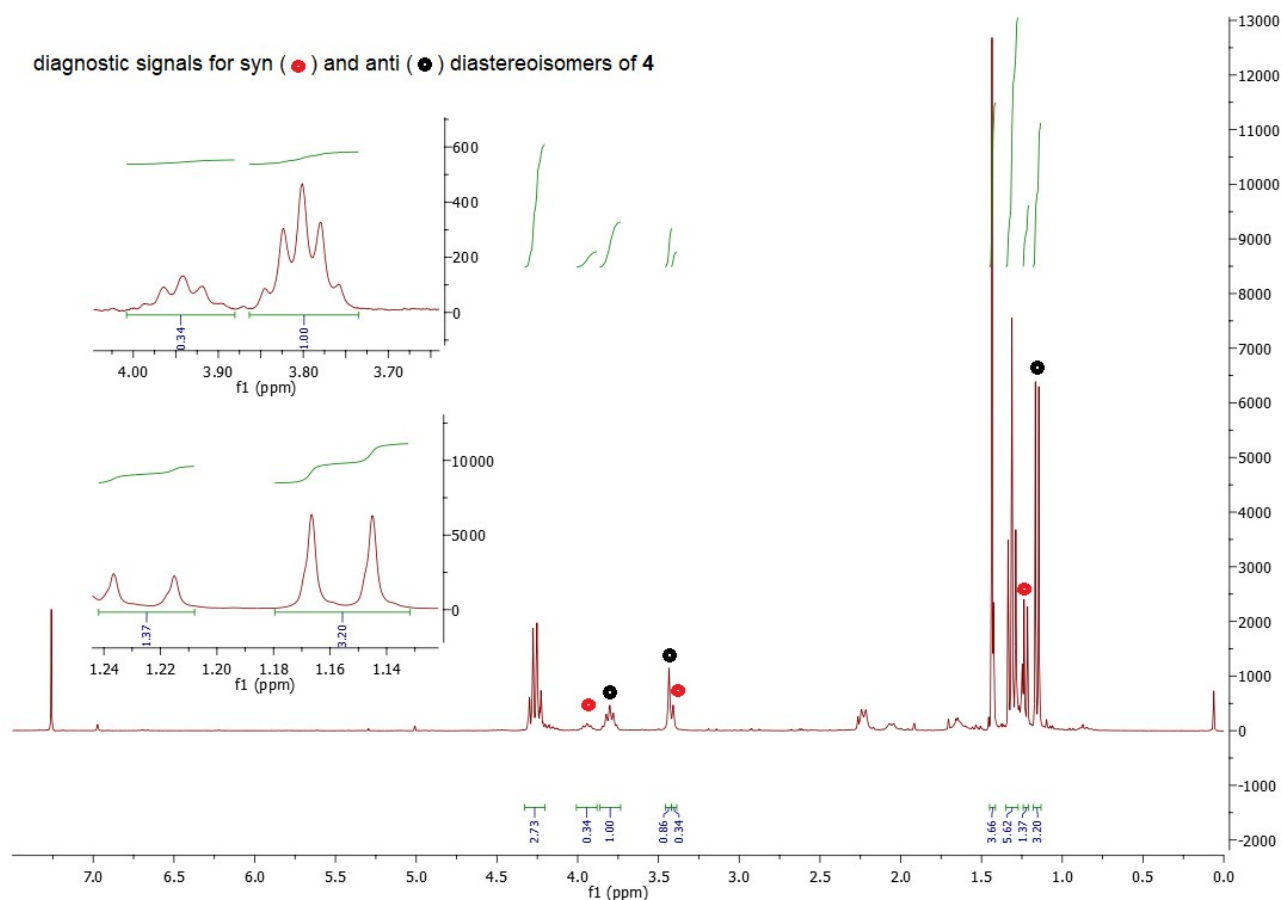

**Figure S6.**  $^1\text{H}$ -NMR of the *anti*/*syn* mixture of **4** and chelation model scheme.

For literature data on *syn*- and *anti*-**4**  $^1\text{H}$ -NMR spectra see:

Greiner A.; Ortholand J-Y. Erythroselective aldol condensation of amine free 2-*t*-butyl-5-methyl-2-phenyl-1,3-dioxolan-4-on3 lithium enolate synthesis of ethyl acetolactate enantiomers. *Tetrahedron letters*, **1992**, 33, 1897-1900.

**Synthesis of the ethyl (2*R*,3*S*)-2-*O*-tosyl-2,3-dimethylglycerate (2*R*,3*S*)-6**

A solution of (2*R*,3*S*)-4 (122 mg, 0.75 mmol) and *p*-dimethylaminopyridine (5 mg, 0.04 mmol) in pyridine (1 mL) was cooled to 0 °C and *p*-toluenesulfonyl chloride (190 mg, 1.0 mmol) was added in four portions over 30 min. The mixture was kept at room temperature for 5 h and then diluted with water (5 mL). The suspension was extracted with ethyl acetate (3 × 4 mL) and dried under vacuum. The residue was chromatographed on silica gel with cyclohexane-ethyl acetate 4:1 as eluent to afford the compound (2*R*,3*S*)-6 as a white solid (208 mg, 0.66 mmol), 88% yield. <sup>1</sup>H NMR (400 MHz, CDCl<sub>3</sub>) δ 7.74 (d, *J* = 8.3 Hz, 2H, Ts), 7.32 (d, *J* = 7.9 Hz, 2H, Ts), 4.92 (q, *J* = 6.6 Hz, 1H, CHOTs), 4.24 – 4.00 (m, 2H, CH<sub>2</sub>), 3.28 (br s, 1H, OH), 2.43 (s, 3H, CH<sub>3</sub>), 1.32 (d, *J* = 6.6 Hz, 3H, CH<sub>3</sub>), 1.31 (s, 3H, CH<sub>3</sub>), 1.27 (t, *J* = 7.2 Hz, 3H, CH<sub>3</sub>).

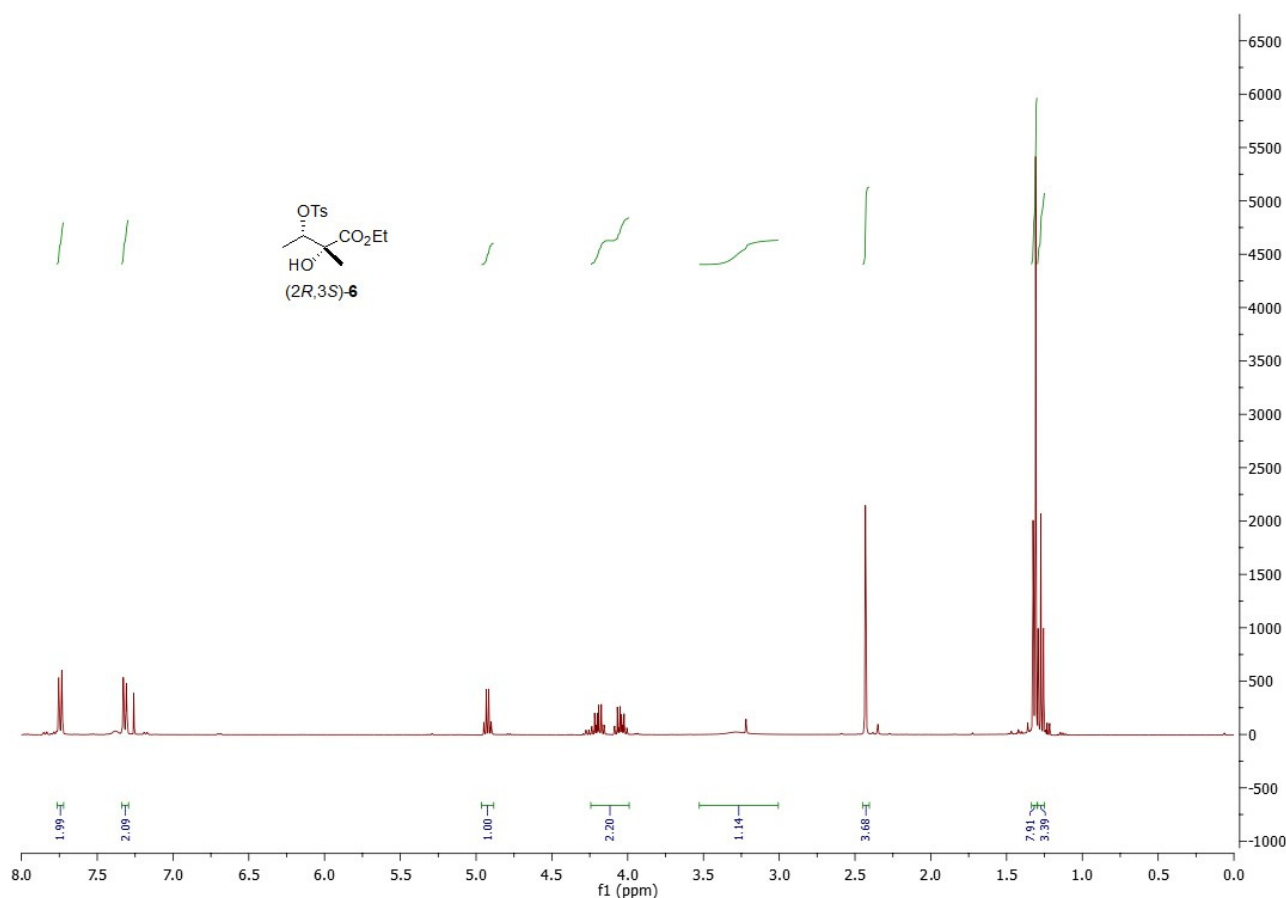

**Figure S7.** Synthesis and <sup>1</sup>H-NMR of compound 6.



### Synthesis of the epoxide (2R,3R)-7

The compound (2R,3S)-6 (208 mg, 0.66 mmol) (2.06 g, 7.2 mmol) was added to a solution of triethylamine (200 mg, 1.98 mmol) and acetic acid (238 mg, 3.96 mmol) in toluene (4 mL) previously stirred at room temperature for half an hour. The mixture was heated to 80 °C, and stirred at this temperature for 4 h. After cooling to room temperature, the reaction mixture was diluted with toluene (10 mL) and was washed successively with aqueous 2 M HCl solution (5 mL) and 10% (w/v) aqueous K<sub>2</sub>CO<sub>3</sub> solution (10 mL). The organic layer was separated, dried over anhydrous Na<sub>2</sub>SO<sub>4</sub> and evaporated. The residue was chromatographed on silica gel with cyclohexane-ethyl acetate 6:1 to afford the epoxide (2R,3R)-7 as a colorless oil (62 mg, 0.43 mmol), 65% yield. <sup>1</sup>H NMR (400 MHz, CDCl<sub>3</sub>) δ 4.23 (qd, *J* = 7.1, 2.3 Hz, 2H, CH<sub>2</sub>), 3.03 (q, *J* = 5.4 Hz, 1H, CH), 1.55 (s, 3H, CH<sub>3</sub>), 1.32 (d, *J* = 5.4 Hz, 3H, CH<sub>3</sub>), 1.29 (t, *J* = 7.1 Hz, 3H, CH<sub>3</sub>).

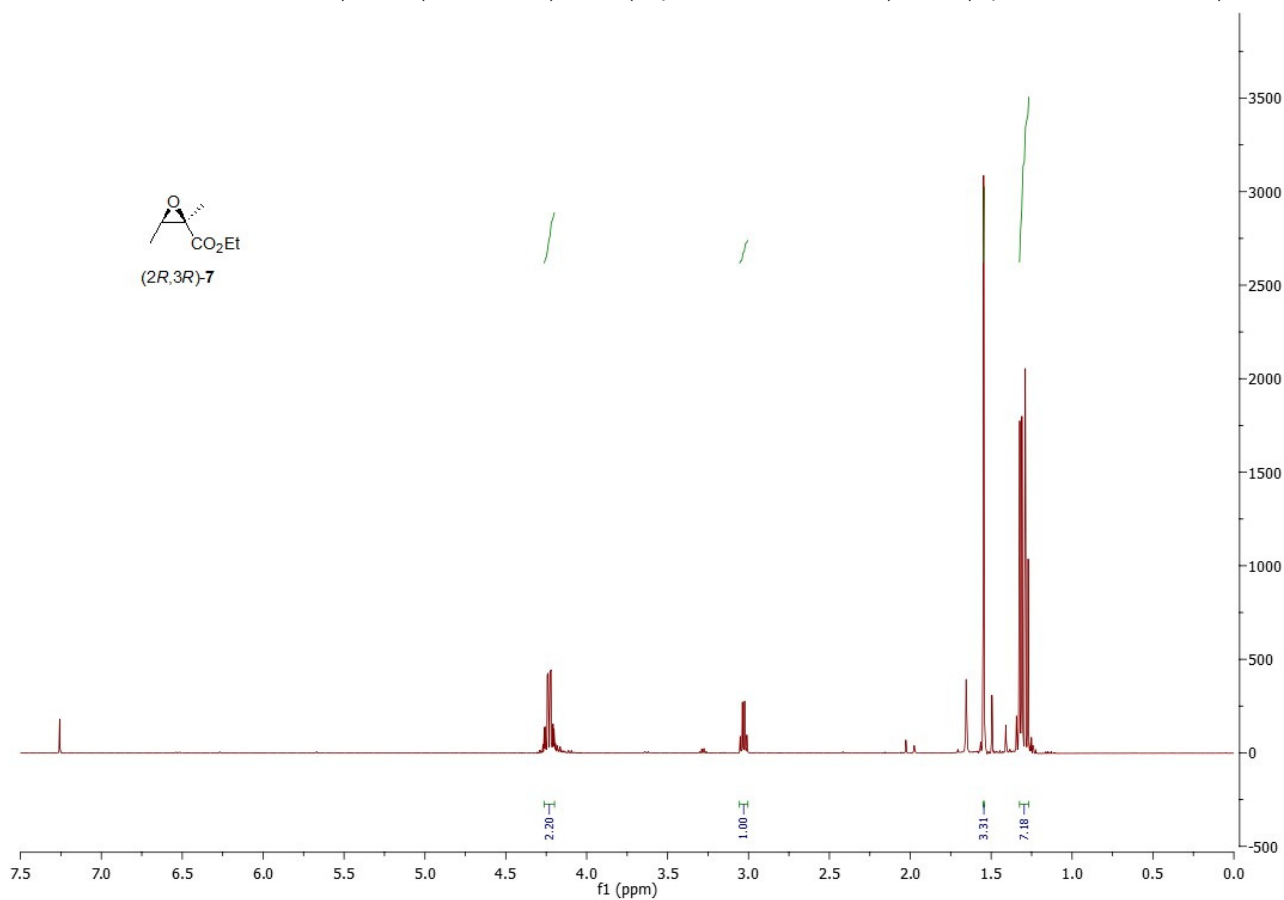

Figure S8. Synthesis and <sup>1</sup>H-NMR of compound 7.

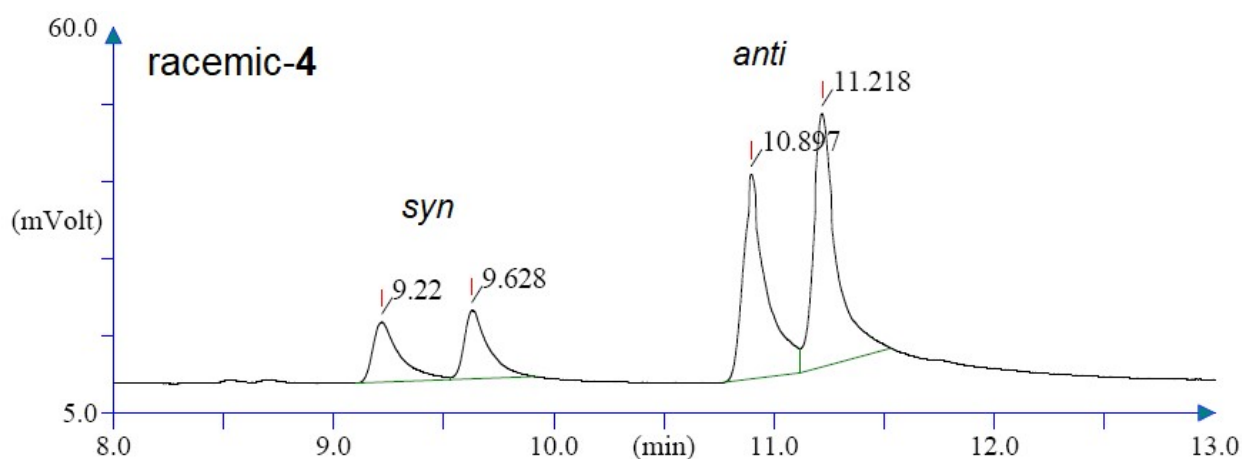

| Retention Time<br>(min) | Area<br>(.1*uV*sec) | Area %<br>(%) | Original Conc |
|-------------------------|---------------------|---------------|---------------|
| 9.220                   | 733601              | 11.695        | 11.695        |
| 9.628                   | 741352              | 11.818        | 11.818        |
| 10.897                  | 2151541             | 34.299        | 34.299        |
| 11.218                  | 2646493             | 42.189        | 42.189        |
|                         | 6272986             |               | 100.000       |

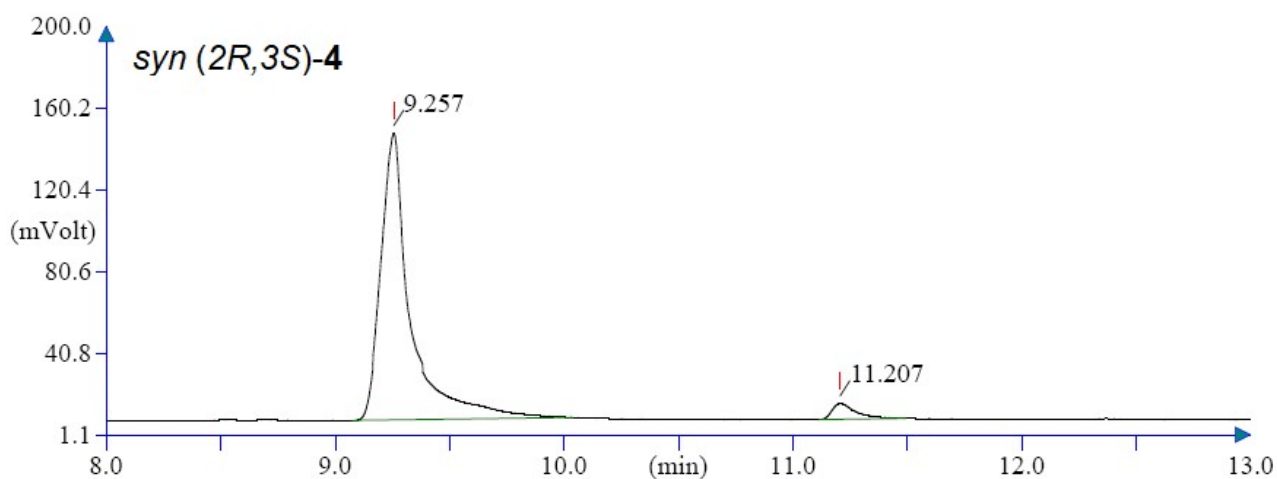

| Retention Time<br>(min) | Area<br>(.1*uV*sec) | Area %<br>(%) | Original Conc | Cor |
|-------------------------|---------------------|---------------|---------------|-----|
| 9.257                   | 12633240            | 95.729        | 95.729        |     |
| 11.207                  | 563576              | 4.271         | 4.271         |     |
|                         | 13196820            |               | 100.000       |     |
|                         | 6272986             |               | 100.000       |     |

Figure S9. Chiral phase GC for the trifluoroacetyl derivative of (2R,3S)-4.

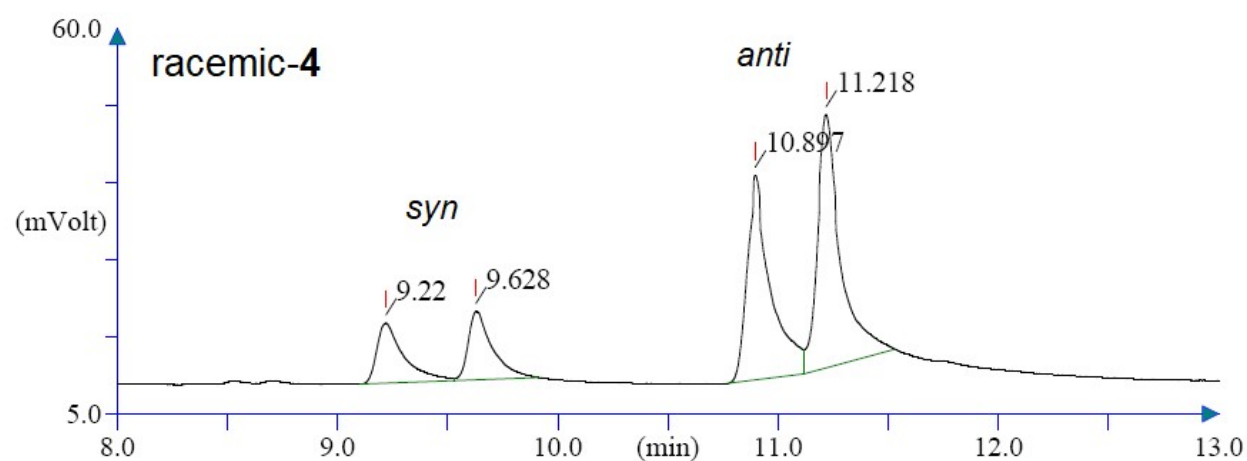

| Retention Time<br>(min) | Area<br>(.1*uV*sec) | Area %<br>(%) | Original Conc |
|-------------------------|---------------------|---------------|---------------|
| 9.220                   | 733601              | 11.695        | 11.695        |
| 9.628                   | 741352              | 11.818        | 11.818        |
| 10.897                  | 2151541             | 34.299        | 34.299        |
| 11.218                  | 2646493             | 42.189        | 42.189        |
|                         | 6272986             |               | 100.000       |

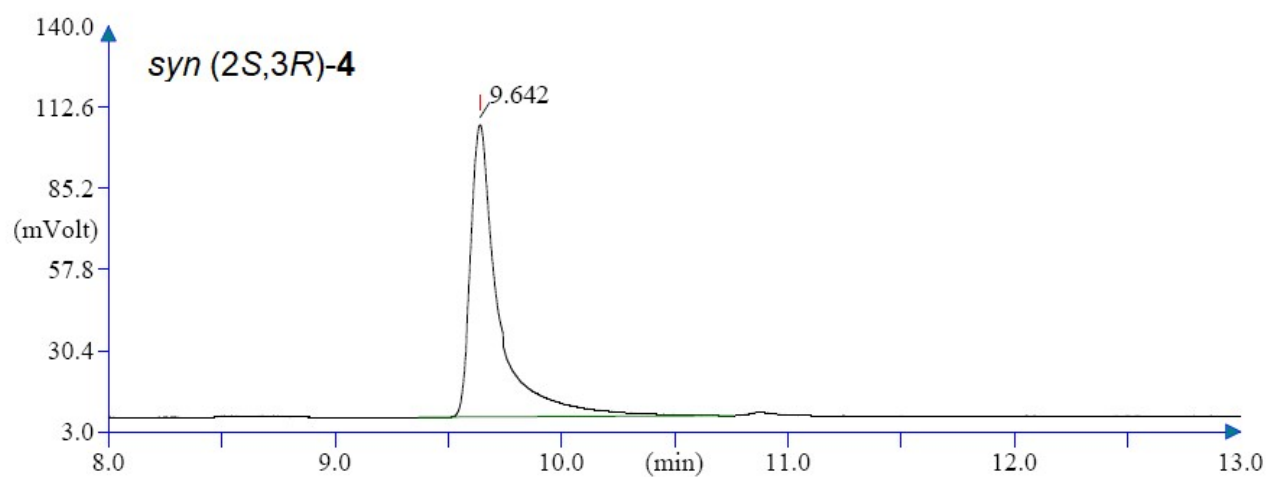

| Retention Time<br>(min) | Area<br>(.1*uV*sec) | Area %<br>(%) | Original Conc | Com |
|-------------------------|---------------------|---------------|---------------|-----|
| 9.642                   | 8546274             | 100.000       | 100.000       |     |
|                         | 8546274             |               | 100.000       |     |

Figure S10. Chiral phase GC for the trifluoroacetyl derivative of (2S,3R)-4.

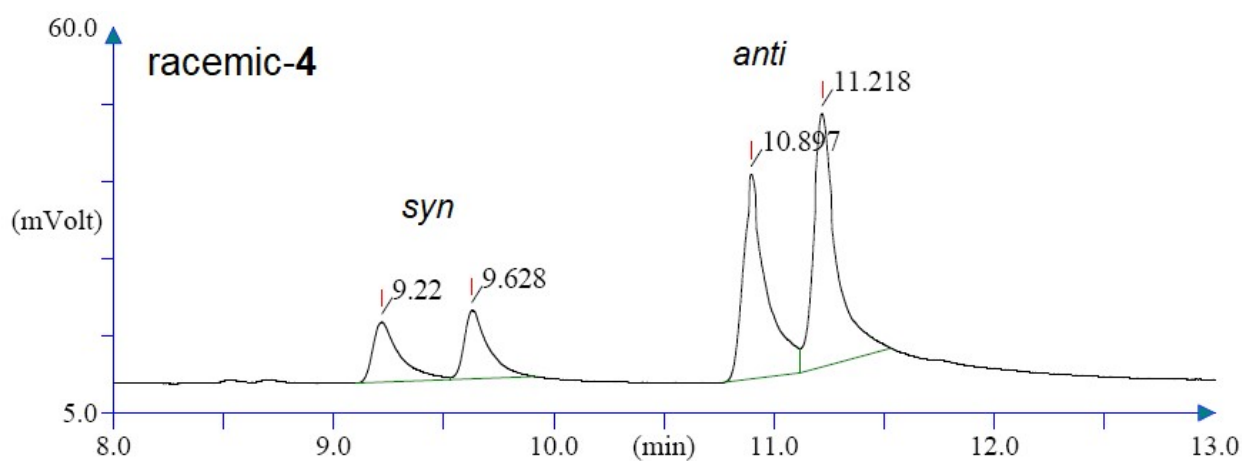

| Retention Time<br>(min) | Area<br>(.1*uV*sec) | Area %<br>(%) | Original Conc |
|-------------------------|---------------------|---------------|---------------|
| 9.220                   | 733601              | 11.695        | 11.695        |
| 9.628                   | 741352              | 11.818        | 11.818        |
| 10.897                  | 2151541             | 34.299        | 34.299        |
| 11.218                  | 2646493             | 42.189        | 42.189        |
|                         | 6272986             |               | 100.000       |

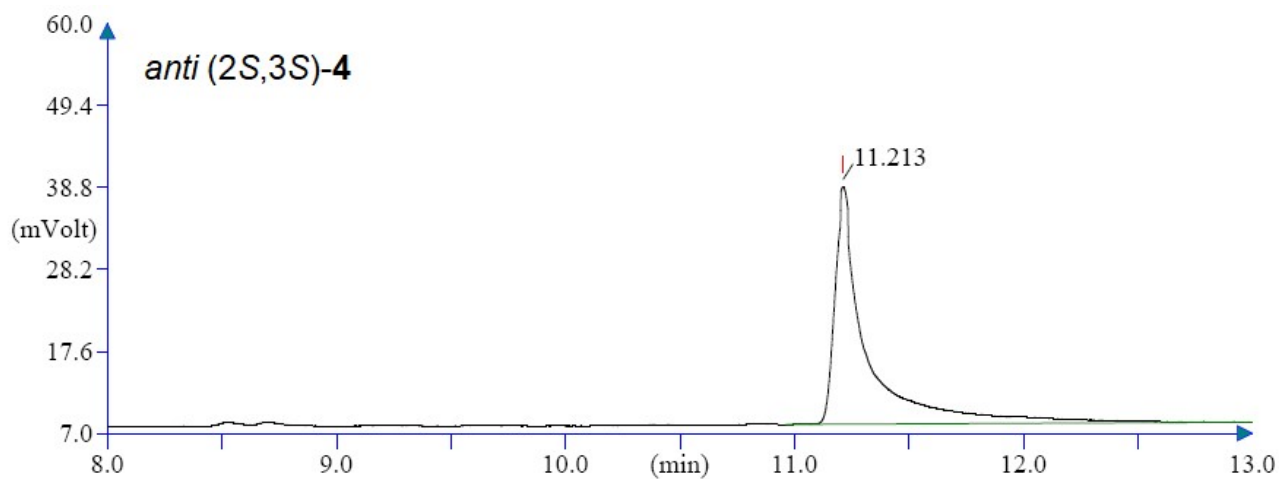

| Retention Time<br>(min) | Area<br>(.1*uV*sec) | Area %<br>(%) | Original Conc | Cor |
|-------------------------|---------------------|---------------|---------------|-----|
| 11.213                  | 3011497             | 100.000       | 100.000       |     |
|                         | 3011497             |               | 100.000       |     |

Figure S11. Chiral phase GC for the trifluoroacetyl derivative of (2S,3S)-4.



| Retention Time<br>(min) | Area<br>(.1*uV*sec) | Area %<br>(%) | Original Conc |
|-------------------------|---------------------|---------------|---------------|
| 9.220                   | 733601              | 11.695        | 11.695        |
| 9.628                   | 741352              | 11.818        | 11.818        |
| 10.897                  | 2151541             | 34.299        | 34.299        |
| 11.218                  | 2646493             | 42.189        | 42.189        |
|                         | 6272986             |               | 100.000       |

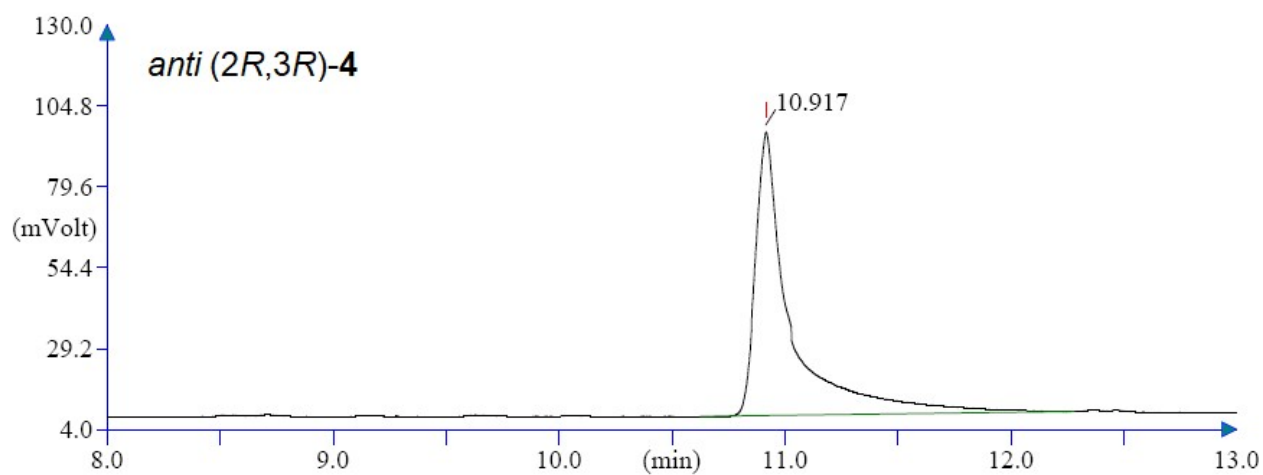

| Retention Time<br>(min) | Area<br>(.1*uV*sec) | Area %<br>(%) | Original Conc | Com |
|-------------------------|---------------------|---------------|---------------|-----|
| 10.917                  | 9671712             | 100.000       | 100.000       |     |
|                         | 9671712             |               | 100.000       |     |

Figure S12. Chiral phase GC for the trifluoroacetyl derivative of (2R,3S)-4.

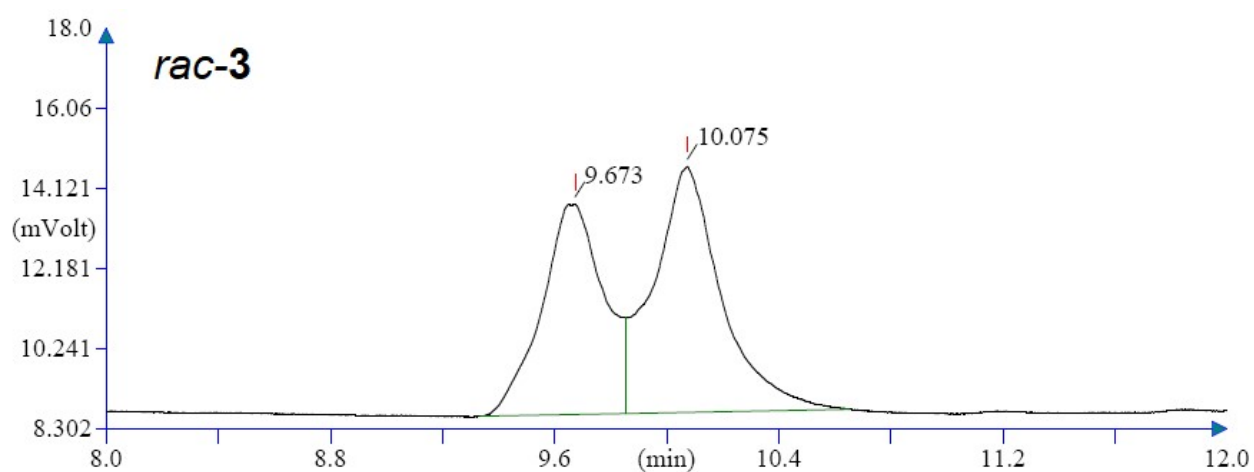

| Retention Time<br>(min) | Area<br>(.1*uV*sec) | Area %<br>(%) | Original Conc | Com |
|-------------------------|---------------------|---------------|---------------|-----|
| 9.673                   | 785967              | 43.866        | 43.866        |     |
| 10.075                  | 1005780             | 56.134        | 56.134        |     |
|                         | 1791746             |               | 100.000       |     |

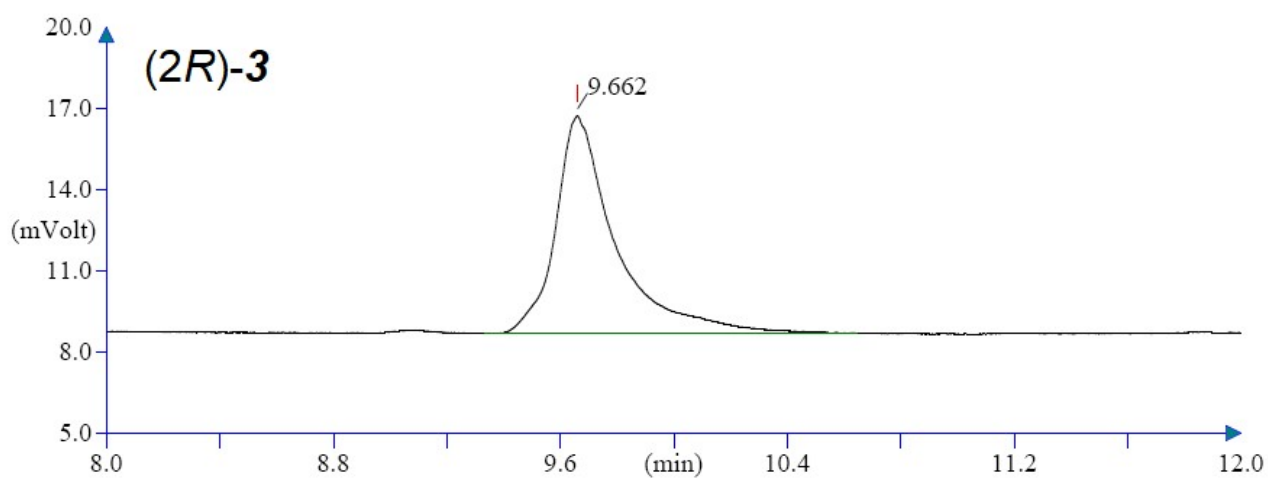

| Retention Time<br>(min) | Area<br>(.1*uV*sec) | Area %<br>(%) | Original Conc | Con |
|-------------------------|---------------------|---------------|---------------|-----|
| 9.662                   | 1178508             | 100.000       | 100.000       |     |
|                         | 1178508             |               | 100.000       |     |

Figure S13. Chiral phase GC for the trifluoroacetyl derivative of (2R)-3.



| Retention Time<br>(min) | Area<br>(.1*uV*sec) | Area %<br>(%) | Original Conc | Com |
|-------------------------|---------------------|---------------|---------------|-----|
| 9.673                   | 785967              | 43.866        | 43.866        |     |
| 10.075                  | 1005780             | 56.134        | 56.134        |     |
|                         | 1791746             |               | 100.000       |     |

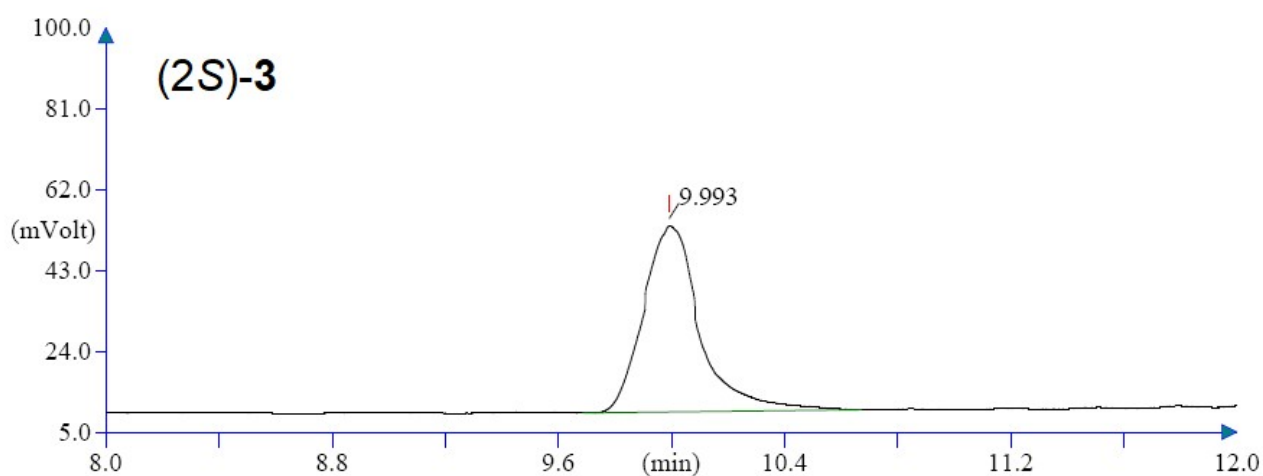

| Retention Time<br>(min) | Area<br>(.1*uV*sec) | Area %<br>(%) | Original Conc | Con |
|-------------------------|---------------------|---------------|---------------|-----|
| 9.993                   | 6072989             | 100.000       | 100.000       |     |
|                         | 6072989             |               | 100.000       |     |

**Figure S14.** Chiral phase GC for the trifluoroacetyl derivative of (2S)-3.
